# Supplementary material
Source: Springer Nature journal article supplement (https://www.springermedizin.de/resource/supplementary/12885_2011_3177_MOESM1_ESM.pdf/9462882)

1A

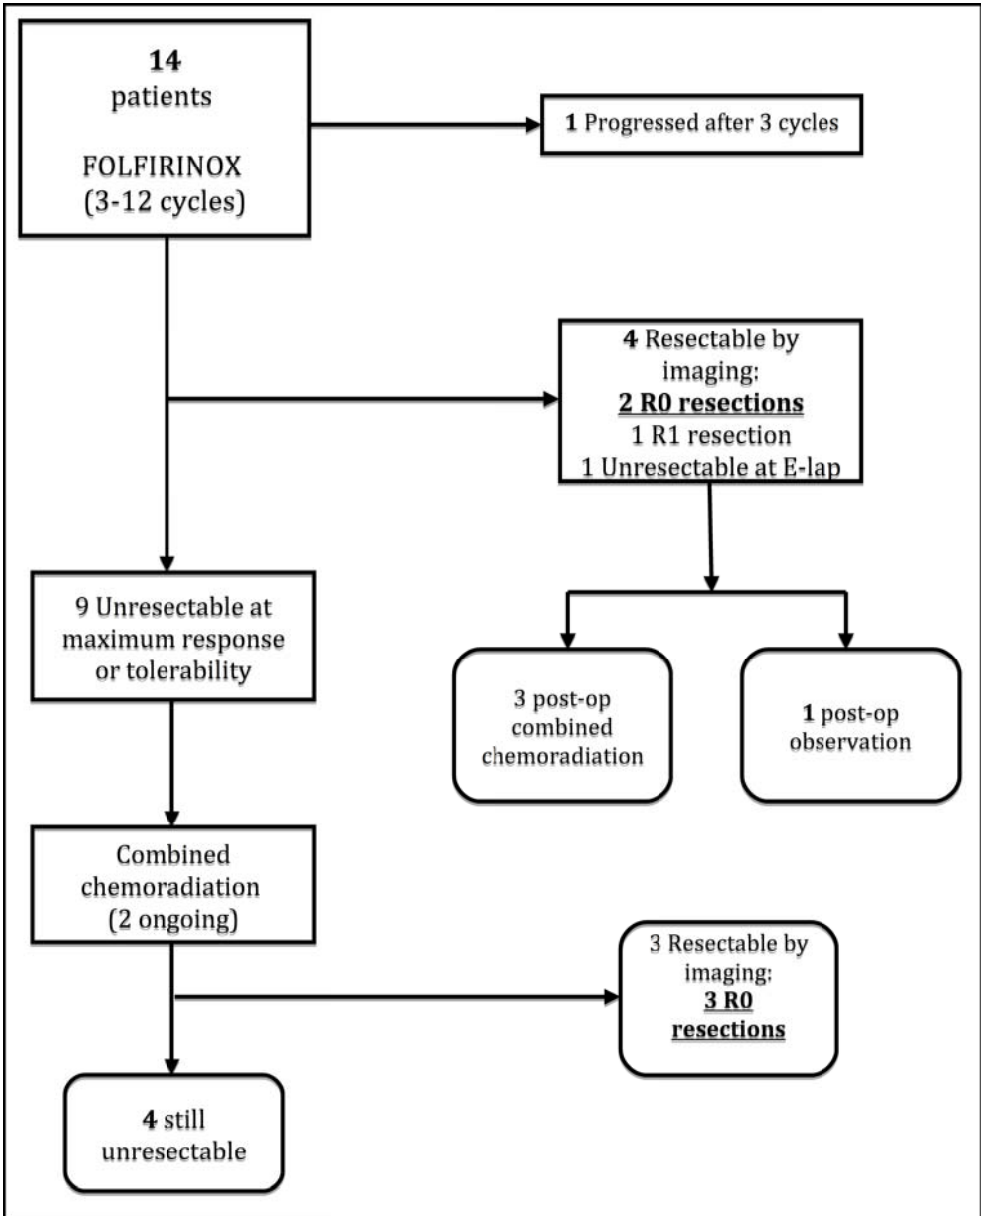

1B

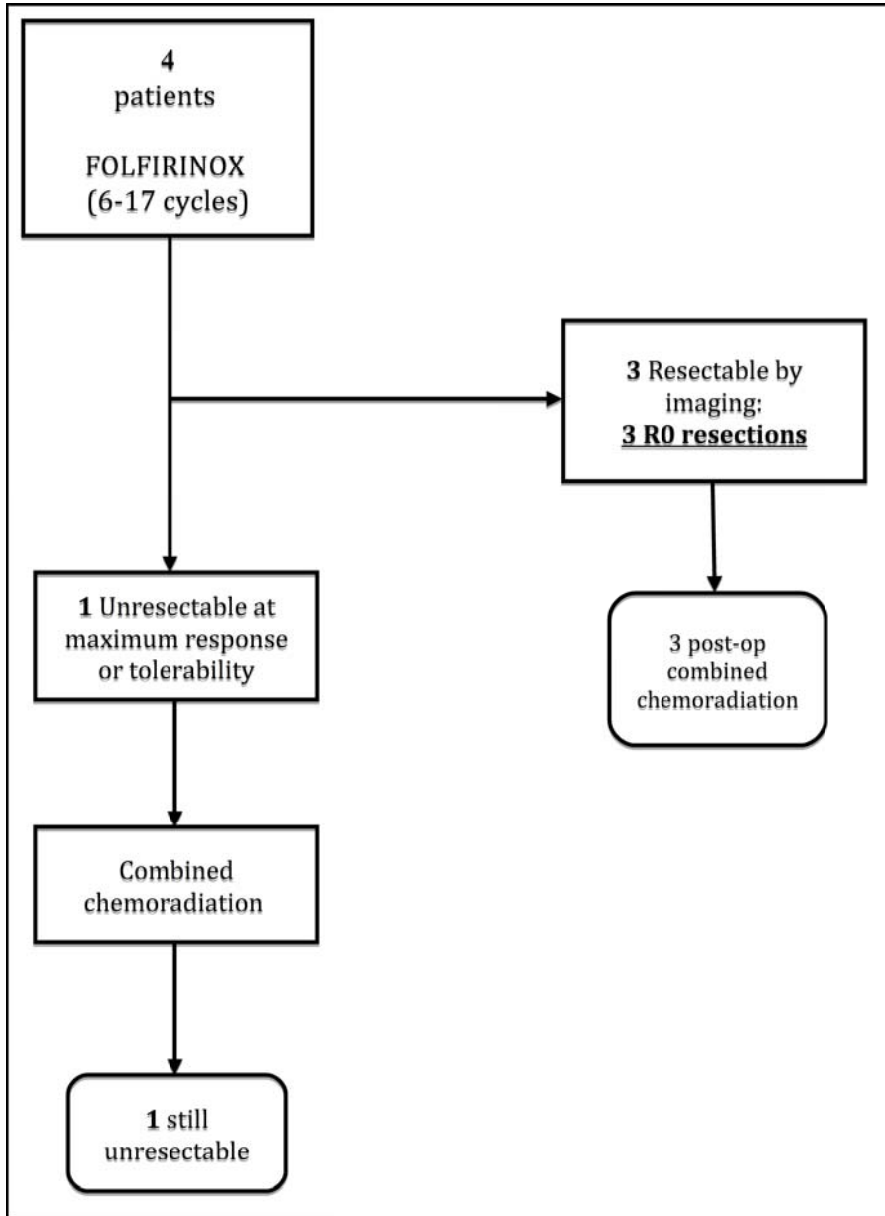

Supplement: MOESM1 [file 9462882]
